## RETRACTION

# Retraction: Diversity of fungal pathogens associated with loquat and development of novel virulence scales

The *PLOS ONE* Editors

The *PLOS ONE* Editors retract this article [1] because it was identified as one of a series of submissions for which we have concerns about authorship, competing interests, and peer review. We regret that the issues were not addressed prior to the article's publication.

AMAS agreed with the retraction. MFA, SB, AUD, MR, SSA, AMES, YL, ATKZ, and MJA did not agree with the retraction. SK, SM, NU, and KZ either did not respond directly or could not be reached.

## Reference

1. Fahim Abbas M, Batool S, Khaliq S, Mubeen S, Azziz-ud-Din, Ullah N, et al. (2021) Diversity of fungal pathogens associated with loquat and development of novel virulence scales. *PLoS ONE* 16(10): e0257951. <https://doi.org/10.1371/journal.pone.0257951> PMID: 34648523

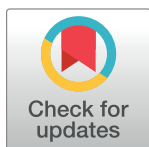

## OPEN ACCESS

**Citation:** The *PLOS ONE* Editors (2022) Retraction: Diversity of fungal pathogens associated with loquat and development of novel virulence scales. *PLoS ONE* 17(8): e0272197. <https://doi.org/10.1371/journal.pone.0272197>

**Published:** August 3, 2022

**Copyright:** © 2022 The PLOS ONE Editors. This is an open access article distributed under the terms of the [Creative Commons Attribution License](https://creativecommons.org/licenses/by/4.0/), which permits unrestricted use, distribution, and reproduction in any medium, provided the original author and source are credited.
